# Supplementary material for: Tri-methylation of ATF7IP by G9a/GLP recruits the chromodomain protein MPP8
Source: PubMed Central journal article supplement (PMC6172828; doi:10.1186/s13072-018-0231-z), 2018-10-04
Supplement: 13072_2018_231_MOESM2_ESM.pdf [file 13072_2018_231_MOESM2_ESM.pdf]

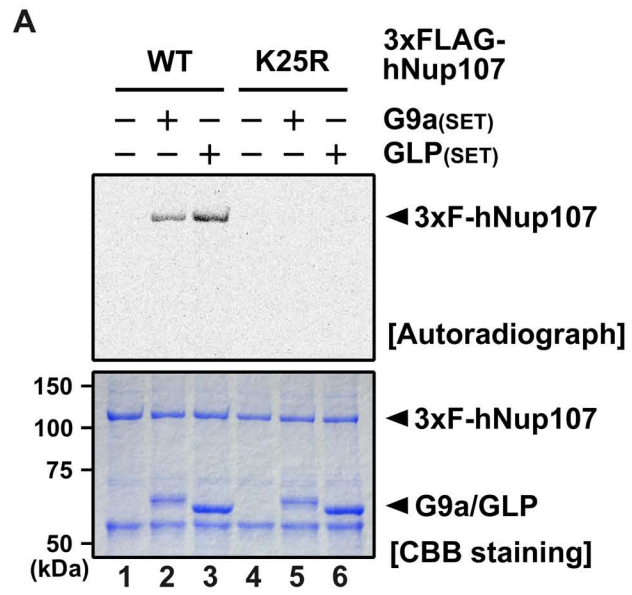

Figure S1
